# Supplementary material for: LIM domain–binding 1 maintains the terminally differentiated state of pancreatic β cells
Source: JCI journal article supplement (doi:10.1172/jci88016), 2016-12-11

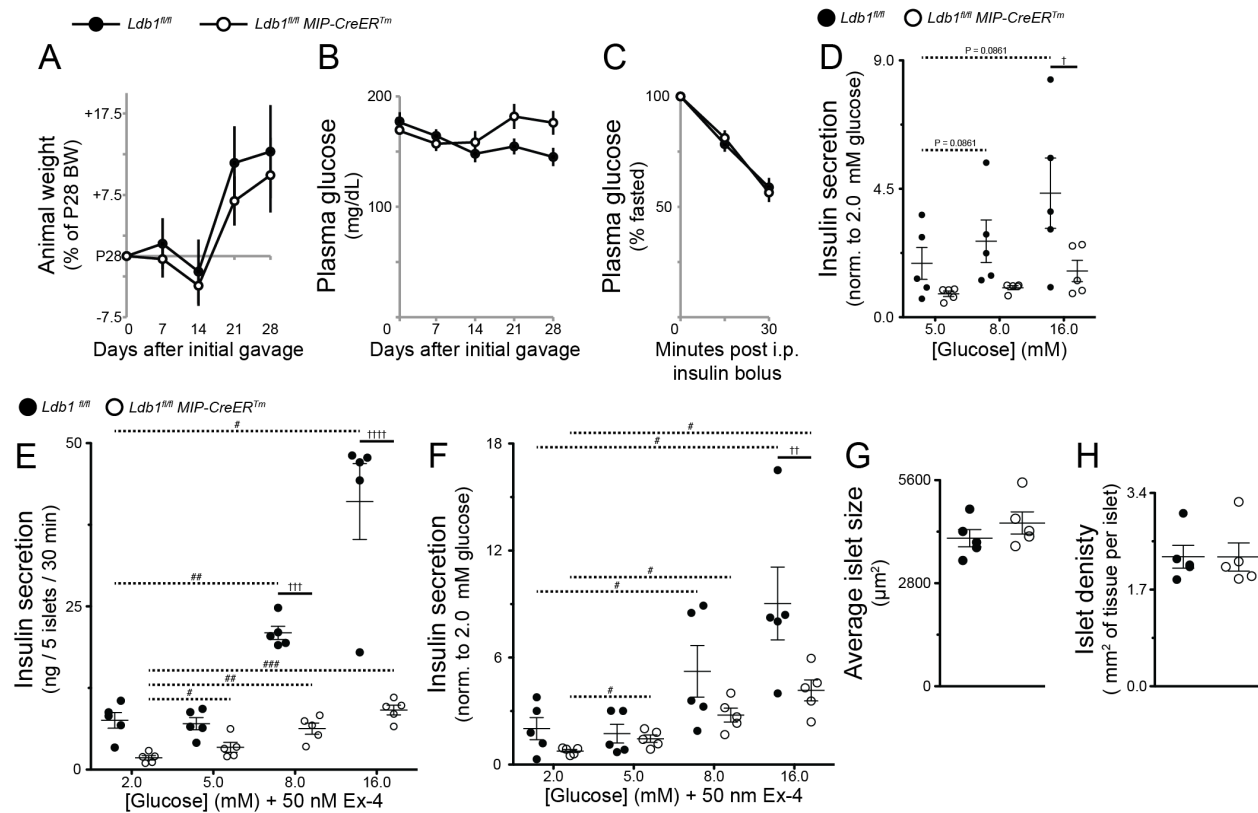

**Supplemental Figure 1. Related to Figure 1. Blunted insulin secretion is the most prominent metabolic defect resulting from ablating  $\beta$ -cell *Ldb1*.** A. Bodyweight, as a percentage of bodyweight at P28, tracked after initial Tm gavage at P28. B. Weekly random blood glucose tracked after initial Tm gavage at P28. A-B. *Ldb1<sup>fl/fl</sup>*, n = 9; *Ldb1<sup>fl/fl</sup> MIP-CreER<sup>Tm</sup>*, n = 11. C. P56 insulin tolerance test (*Ldb1<sup>fl/fl</sup>*, n = 9; *Ldb1<sup>fl/fl</sup> MIP-CreER<sup>Tm</sup>*, n = 10). D. Static glucose islet incubations: absolute insulin secretion normalized (norm.) to baseline secretion at 2.0mM glucose. E-F. Static glucose islet incubations + 50nM Ex-4: (E) absolute insulin secretion and (F) absolute insulin secretion norm. to baseline secretion at 2.0mM glucose. G. Quantified average islet size. H. Quantified pancreatic islet density. D-H. *Ldb1<sup>fl/fl</sup>*, n = 5; *Ldb1<sup>fl/fl</sup> MIP-CreER<sup>Tm</sup>*, n = 5. A-F. Repeated measures, two-way ANOVA with Bonferroni correction,  $\dagger$  = P < 0.05 /  $\dagger\dagger$  = P < 0.01 /  $\dagger\dagger\dagger$  = P < 0.001 /  $\dagger\dagger\dagger\dagger$  = P < 0.0001. D-F. Repeated measures, one-way ANOVA with Holm-Šidák correction,  $\#$  = P < 0.05 /  $\#\#$  = P < 0.01 /  $\#\#\#$  = P < 0.001. (E-F) Only the post-hoc comparisons to the respective 2.0 mM glucose treatments were analyzed. G-H. Student's two-way t-test. Absent statistical annotation in A-H indicates comparisons that were not significant. Pooled data represent mean  $\pm$  SEM.

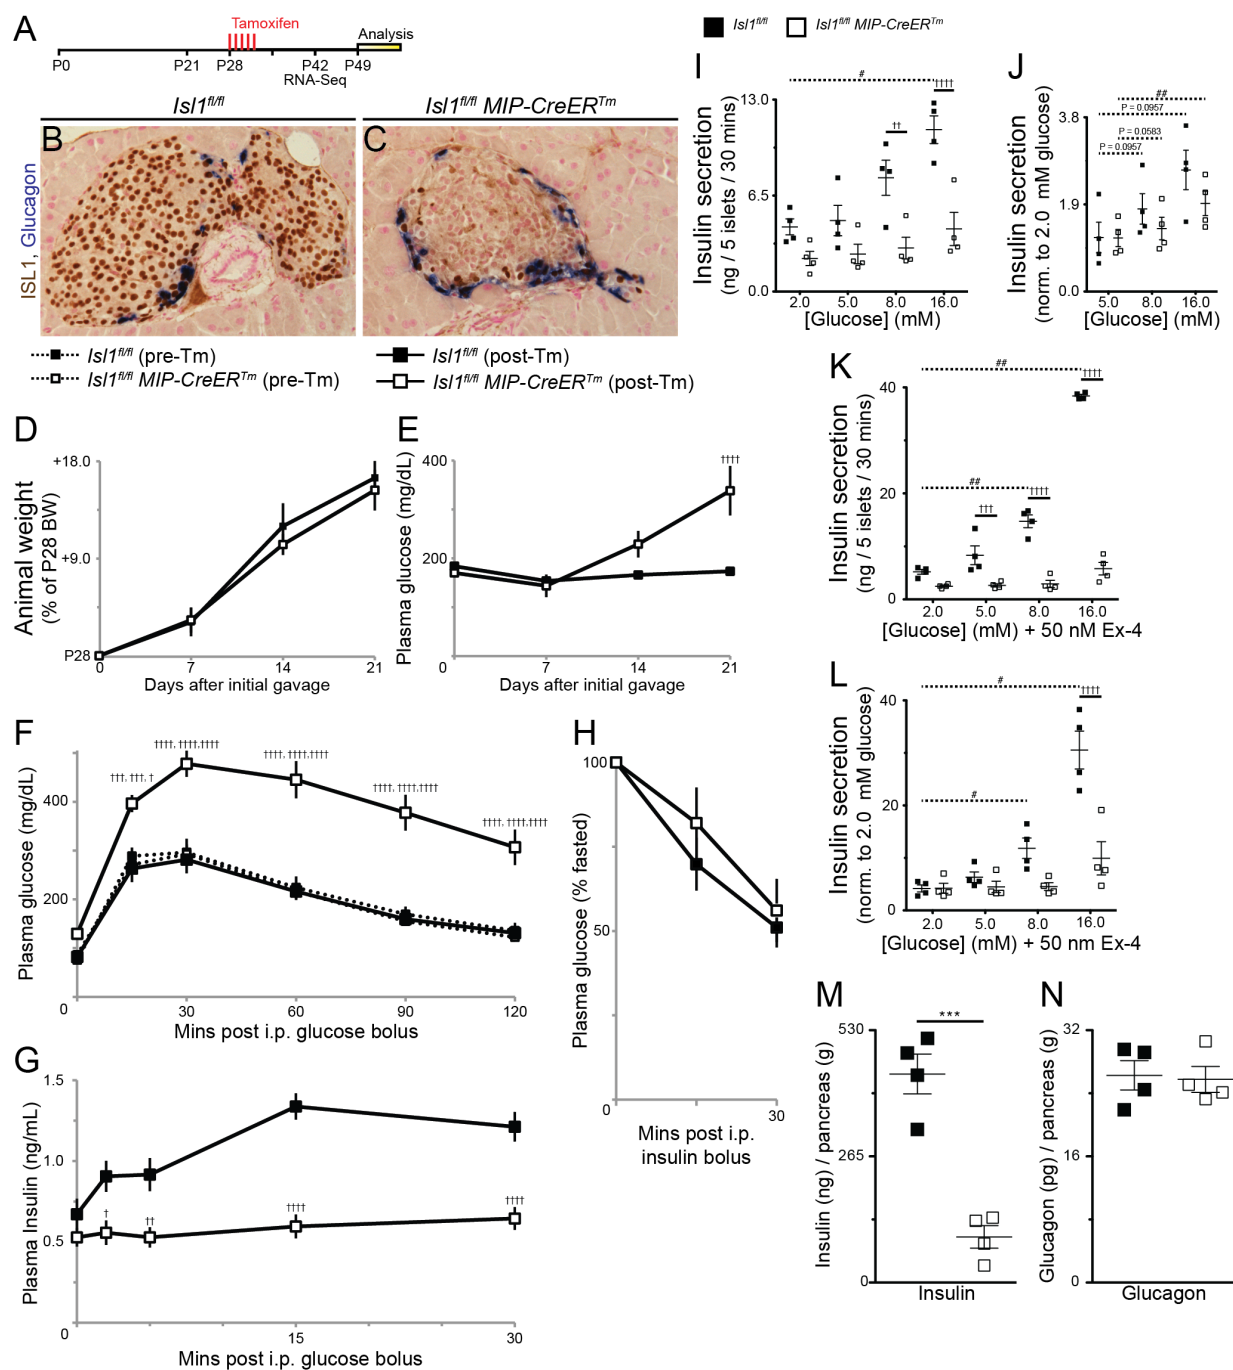

**Supplemental Figure 2. Related to Figure 1. Ablating *Isl1* in the mature  $\beta$ -cell phenocopies *Ldb1* ablation.** A. Tamoxifen administration schedule for the *Isl1<sup>fl/fl</sup>* and *Isl1<sup>fl/fl</sup> MIP-CreER<sup>tm</sup>* mice. Red hashes indicate tamoxifen gavages; the yellow box indicates experimental analysis window. B-C. Immunohistochemistry for ISL1 and glucagon from ~P49 pancreata. D. Bodyweight, as a percentage of bodyweight at P28, tracked after initial tamoxifen gavage. E. Weekly random blood glucose tracked after initial Tm gavage. F. IPGTTs performed at P28 prior to tamoxifen administration (pre-Tm) (*Isl1<sup>fl/fl</sup>*, n = 6; *Isl1<sup>fl/fl</sup> MIP-CreER<sup>tm</sup>*, n = 8) and P49 following completion of tamoxifen pulse-chase (post-Tm) (*Isl1<sup>fl/fl</sup>*, n = 7; *Isl1<sup>fl/fl</sup> MIP-CreER<sup>tm</sup>*, n = 7). Statistical annotation reflects the post-hoc comparisons at each time point in following order: post-Tm *Isl1<sup>L/L</sup> MIP-CreER<sup>tm</sup>* mice compared to 1) post-Tm

*Isl1<sup>fl/fl</sup>*, 2) pre-Tm *Isl1<sup>fl/fl</sup> MIP-CreER<sup>Tm</sup>* and 3) pre-Tm *Isl1<sup>fl/fl</sup>* mice. G. P49 GSIS assay. H. P49 insulin tolerance test (*Isl1<sup>fl/fl</sup>*, n = 5; *Isl1<sup>fl/fl</sup> MIP-CreER<sup>Tm</sup>*, n = 5). I-J. P49 static glucose islet incubations: (I) absolute insulin secretion and (J) absolute insulin secretion normalized (norm.) to baseline secretion at 2.0mM glucose. K-L. P49 static glucose islet incubations + 50nM Ex-4: (K) absolute insulin secretion and (L) absolute insulin secretion norm. to baseline secretion at 2.0mM glucose. M. Total pancreatic insulin content. N. Total pancreatic glucagon content. B-C and I-N. *Isl1<sup>fl/fl</sup>*, n = 4; *Isl1<sup>fl/fl</sup> MIP-CreER<sup>Tm</sup>*, n = 4. D-E and G. *Isl1<sup>fl/fl</sup>*, n = 7; *Isl1<sup>fl/fl</sup> MIP-CreER<sup>Tm</sup>*, n = 7. Repeated measures, two-way ANOVA with (F) Holm-Šidák or (D-E and G-L) Bonferroni correction, <sup>†</sup> = P < 0.05 / <sup>†††</sup> = P < 0.001 / <sup>††††</sup> = P < 0.0001. I-L. Repeated measures, one-way ANOVA with Holm-Šidák correction, <sup>#</sup> = P < 0.05 / <sup>###</sup> = P < 0.01. Only the post-hoc comparisons to the respective 2.0 mM glucose treatments were analyzed. M-N. Student's two-way t-test, <sup>\*\*\*</sup> = p < 0.001. Absent statistical annotation in D-L, and N indicates comparisons that were not significant. All images taken at 20x zoom. Pooled data represent mean ± SEM.

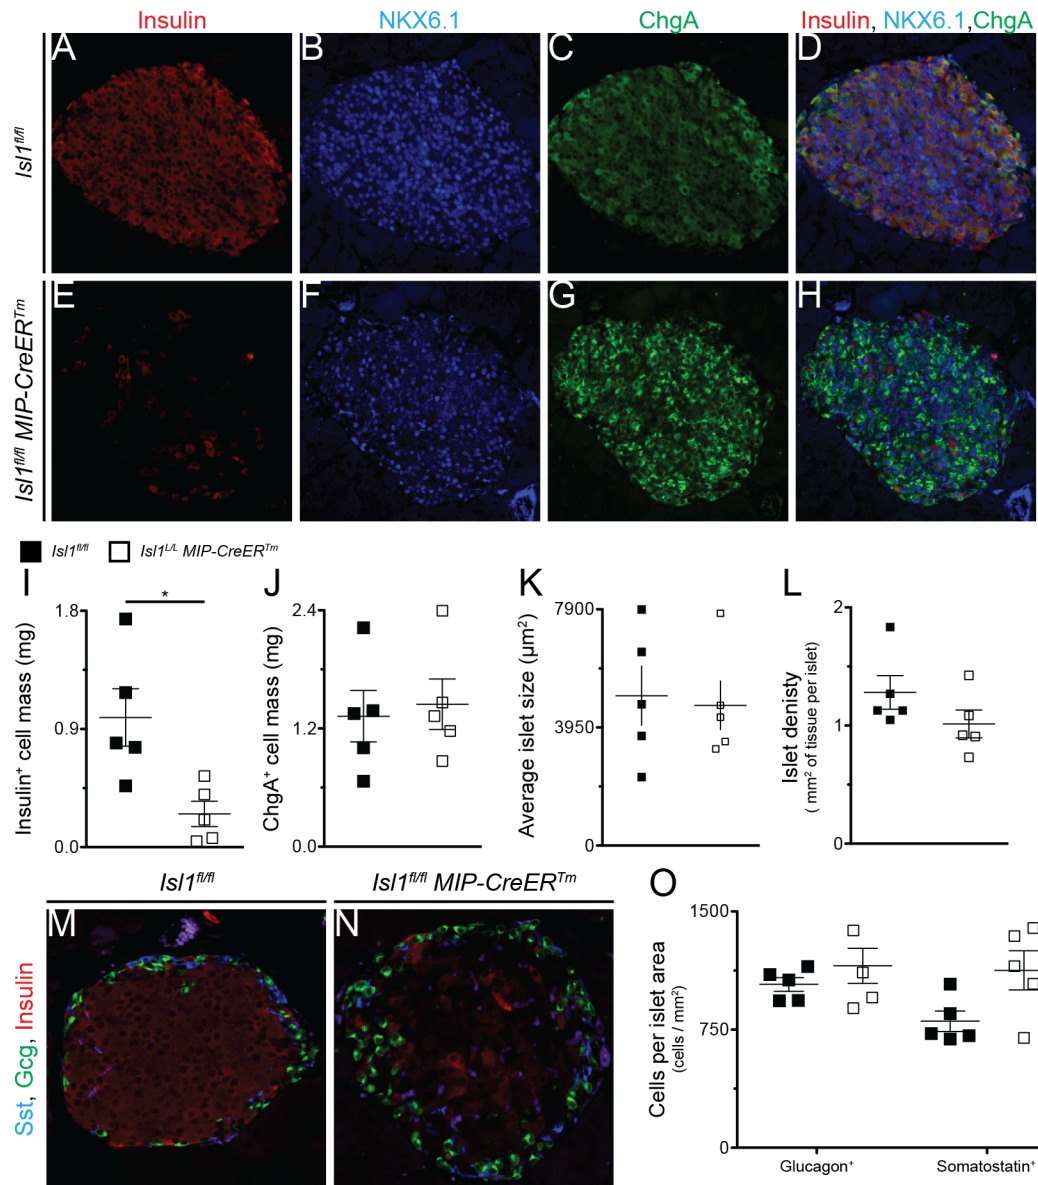

**Supplemental Figure 3. Related to Figure 2. Loss of insulin after *Isl1* ablation.** A-H. Co-immunofluorescence for insulin, Nkx6.1, and chromogranin A at P49. I. Quantified insulin<sup>+</sup> cell mass. J. Quantified chromogranin A<sup>+</sup> cell mass. K. Quantified average islet size. L. Quantified pancreatic islet density. M-N. Co-immunofluorescence for insulin, somatostatin, and glucagon at P49. O. Frequency of glucagon<sup>+</sup> and somatostatin<sup>+</sup> cells within chromogranin A<sup>+</sup> cells mass. A-O. *Isl1<sup>fl/fl</sup>*, n = 5; *Isl1<sup>fl/fl</sup> MIP-CreER<sup>Tm</sup>*, n = 5. I-L Student's two-way t-test, \* = p < 0.05. O. Repeated measures, two-way ANOVA with Bonferroni correction. Absent statistical annotation in I-L, and O indicates comparisons that were not significant. All images taken at 20x zoom. Pooled data represent mean ± SEM.

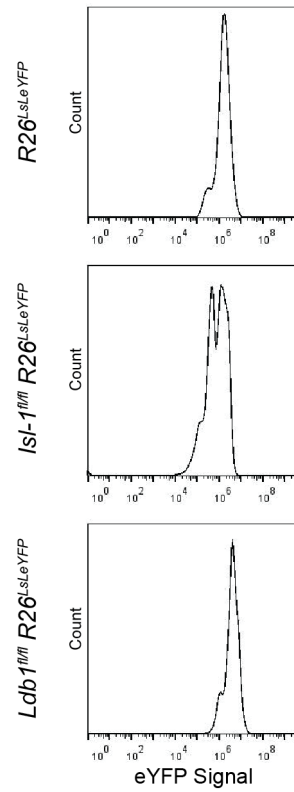

**Supplemental Figure 4. Related to Figure 3. An eYFP<sup>+</sup> population is absent in littermates lacking Cre recombinase. Representative FACS profiles for eYFP signal from littermates lacking Cre recombinase (n=2).**

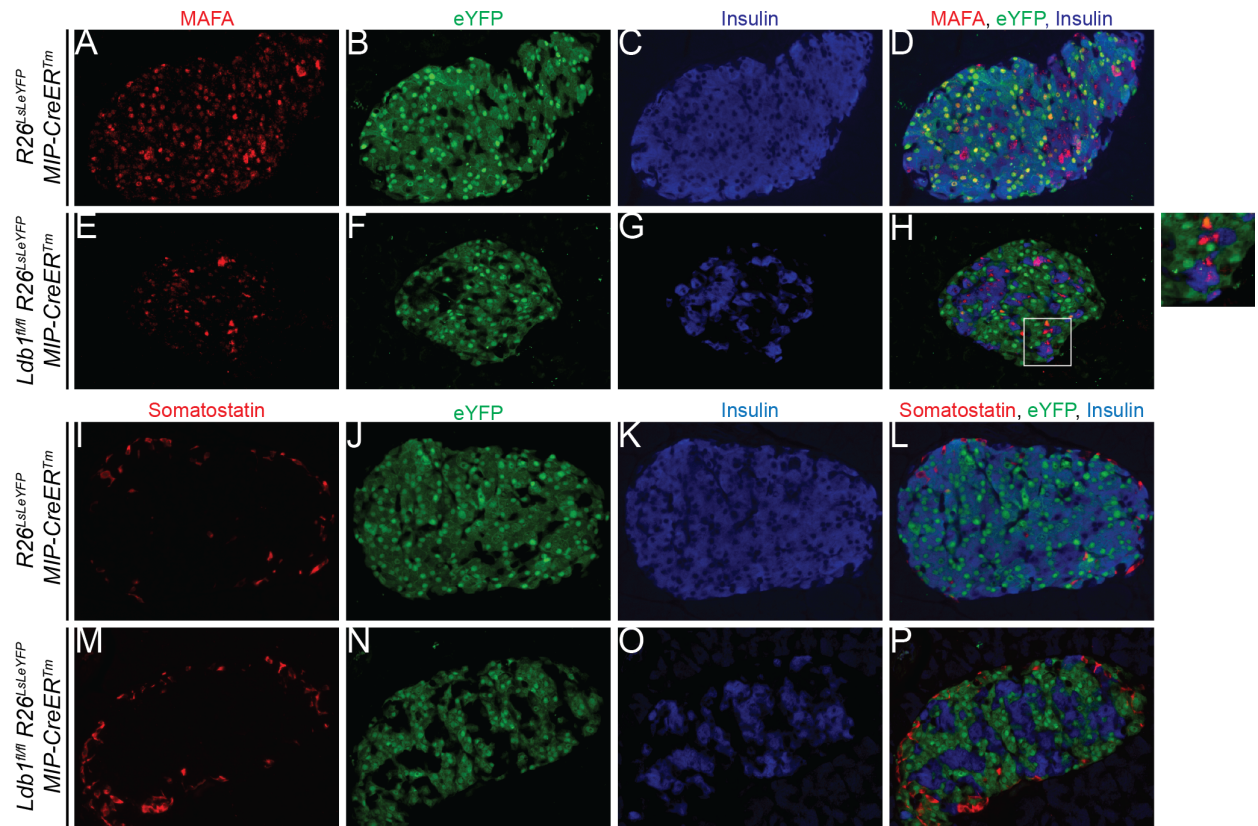

**Supplemental Figure 5. Related to Figure 4. LDB1-depleted  $\beta$ -cells lose MAFA and do not express somatostatin.** A-H. Co-immunofluorescence for MAFA, insulin, and eYFP at P56. I-P. Co-immunofluorescence for somatostatin, insulin, and eYFP at P56. A-P. *Ldb1<sup>fl/fl</sup>*, n = 5; *Ldb1<sup>fl/fl</sup> MIP-CreER<sup>Tm</sup>*, n = 5. All images taken at 20x zoom and insets at 40x zoom.

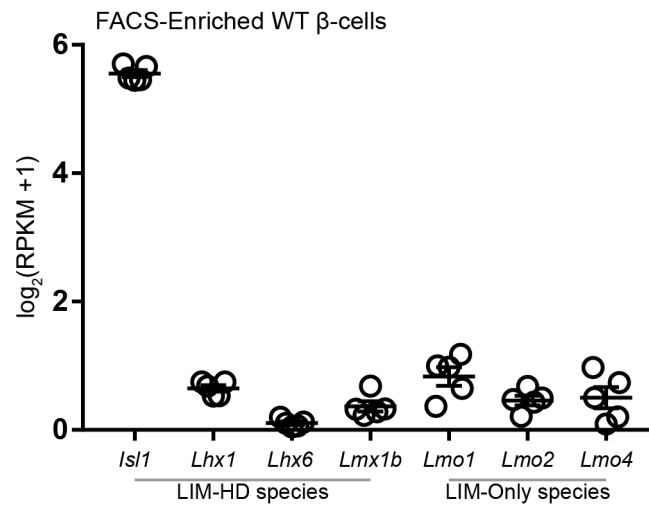

**Supplemental Figure 6. Related to Figure 5. *Isl1* is the predominantly enriched transcript encoding a nuclear tandem LIM-domain factor in mature  $\beta$ -cells.** Expression profile of nuclear LIM-HD and LMO factors detectable in FACS-enriched WT  $\beta$ -cells (n=5). RPKM = Reads per million normalized to sum of gene exon widths and total read depth.

De Novo: 12.07%, P = 1e-48

GGTCCCTAGAGCC

ZBTB12

CTAAGGTTCTAGATCAG

De Novo: 12.38%, P = 1e-29

TCCGGGTTTTGC

SPDEF

GTACATCCGGATTTTT

De Novo: 5.26%, P = 1e-17

CGAATGTCGA

SOX17

TTCATTGTCC

De Novo: 17.06%, P = 1e-16

GGCCTGGATT

TCF1

TTGCCCGGATTAG

**Supplemental Figure 7. Related to Figure 5. ISL1-alone peak set is not strongly enriched for de novo motifs.**

De Novo motif analysis of the H3K4me3-enriched, ISL1-alone peak set. The de novo motif is presented with the percent of the H3K4me3-enriched, ISL1-alone peaks containing it and the P-value. Below the respective de novo motifs are the matched consensus sequence.

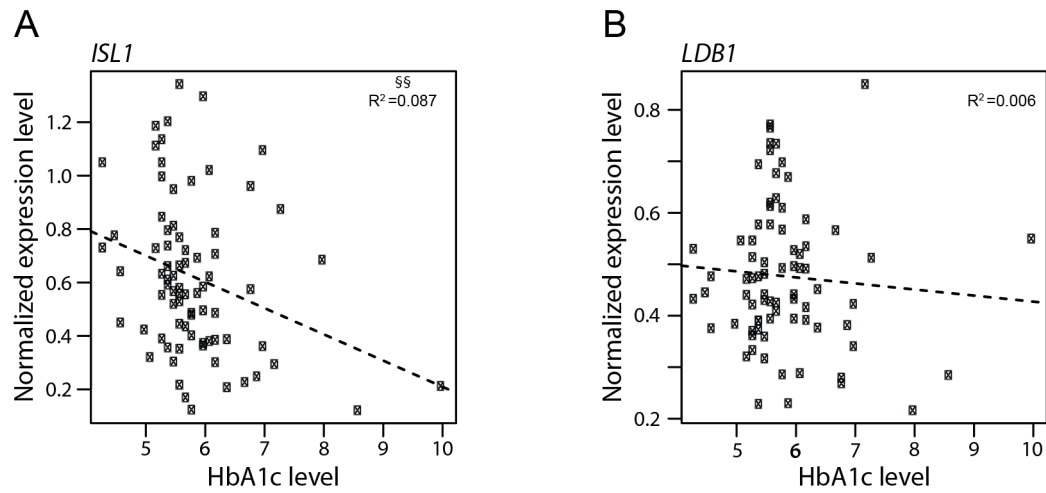

**Supplemental Figure 8. Related to Figure 6. *ISL1* expression in human islets decreases with increasing HbA1c levels.** Reanalysis of a published 77-donor, whole islet RNA-Seq data set (1). A. *ISL1* expression plotted against donor HbA1c levels. B. *LDB1* expression plotted against donor HbA1c levels. A-B. Pearson product-moment correlation coefficient,  $^{ss} = P < 0.01$ . Dotted lines represent linear regression. Absent statistical annotation in B indicates comparisons that were not significant.

### A *Mafa* murine locus-

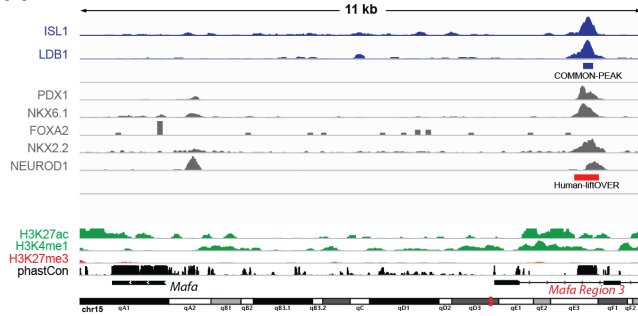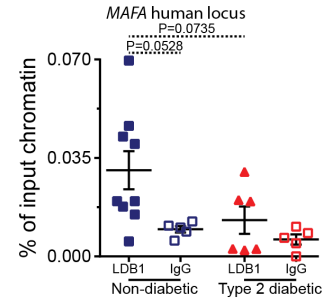

### B *Glis3* murine loci-

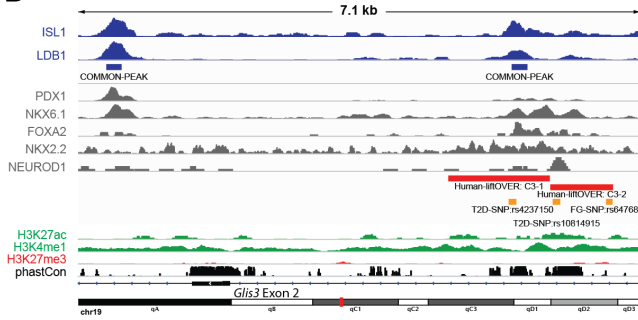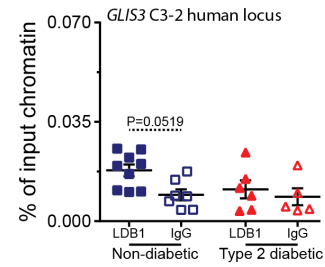

### C *Pdx1* murine locus\*-

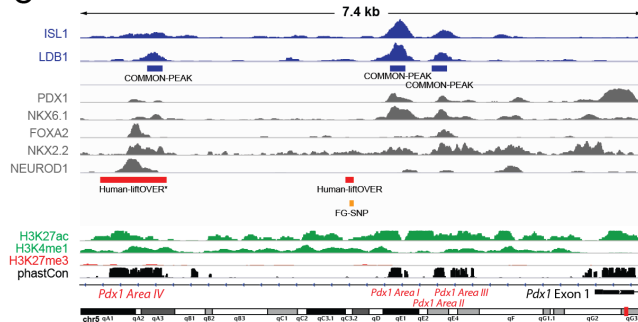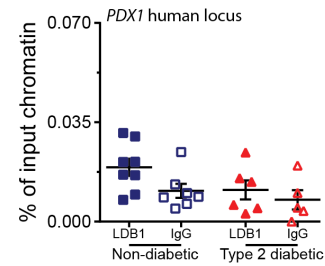

### D *Ddx18* murine negative control locus-

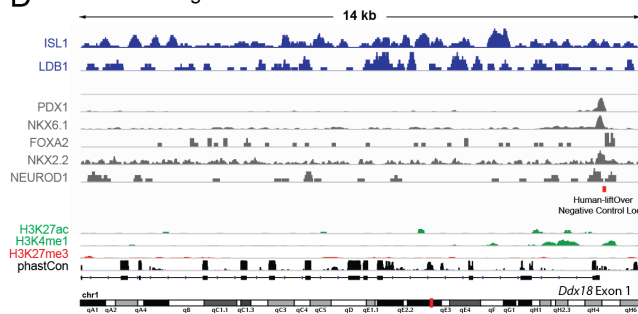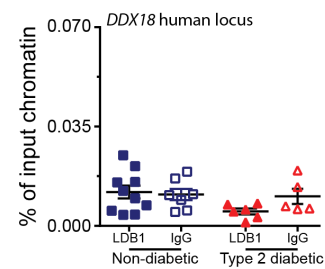

### E *Mnx1* murine loci-

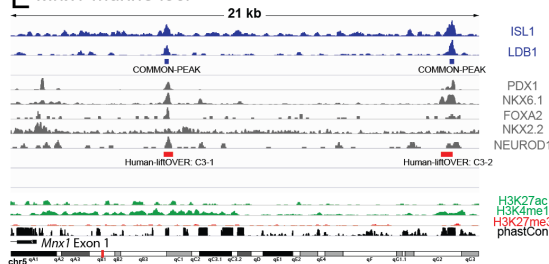

### F *Slc2a2* murine upstream locus-

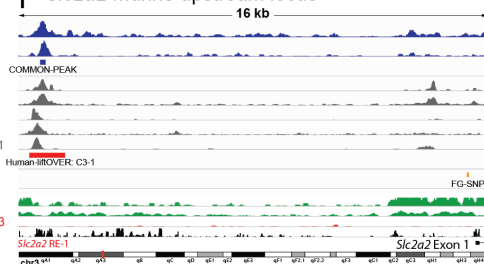

**Supplemental Figure 9. Related to Figure 6. Selected LDB1, ISL1 common peaks corresponding to conserved human islet enhancer regions.** A. Murine *Mafa* locus and ChIP-qPCR at human *MAFA* locus. B. Murine *Glis3* locus and ChIP-qPCR at human *GLIS3* C3-2 locus. C. Murine *Pdx1* locus and ChIP-qPCR at human *PDX1* locus. \* indicates analyzed human enhancer. D. Murine *Ddx18* locus and ChIP-qPCR at human *DDX18* negative control locus. E. Murine *Mnx1* locus. F. Murine *Slc2a2* upstream locus. I-F. IGV windows of murine loci. LDB1 and ISL1 ChIP-seqs labeled in blue. LDB1, ISL1 common peaks are indicated by blue line segments. PDX1, NKX6.1, FOXA2, NKX2.2, and NEUROD1 ChIP-seqs are labeled in gray. Human islet regulome active enhancers: human liftOvers (indicated by red line segments); human SNP liftOvers (indicated by orange line segments). FG, fasting glycemia associated and T2D, type 2 diabetes associated. H3K27ac and H3K4me1 ChIP-seqs are labeled in green; H3K27me3 ChIP-seq is labeled in red; PhastCon (evolutionary conservation) is labeled in black. Published *cis*-elements are indicated in red text. A-D. Nondiabetic donor ChIPs are indicated by blue and white squares: LDB1 IP = blue squares ( $n = 10$ ); normal goat IgG IP = white squares ( $n = 8$ ). Type 2 diabetic donor ChIPs are indicated by red and white triangles: LDB1 IP = red triangles ( $n = 6$ ); normal goat IgG IP = white triangles ( $n = 5$ ). Pooled data represent the mean  $\pm$  SEM. A-D. One-way ANOVA with Holm-Sidak correction for the following post-hoc comparisons: nondiabetic LDB1 versus nondiabetic normal goat IgG; nondiabetic LDB1 versus type 2 diabetic LDB1; type 2 diabetic LDB1 versus type 2 diabetic normal goat IgG; and nondiabetic normal goat IgG versus type 2 diabetic normal goat IgG. Absent statistical annotation in A-D indicates comparisons that were not significant. chr, chromosome. Also see Supplementary Tables 1, 3, and 4.

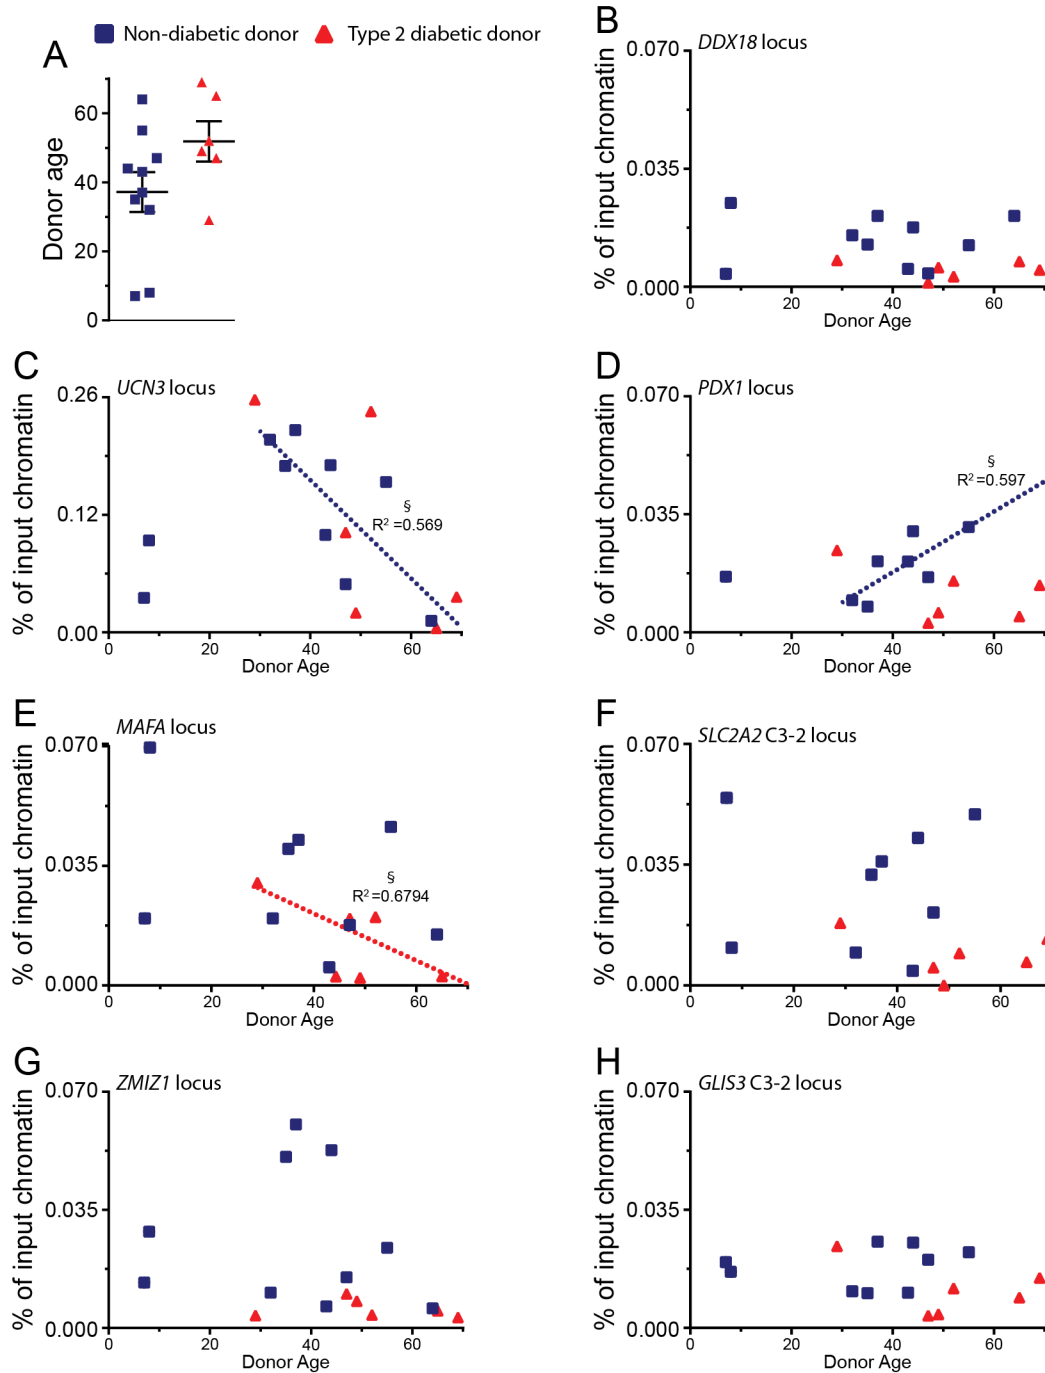

**Supplemental Figure 10. Related to Figure 6. LDB1 enrichment at some human active enhancers correlates with age.** A. Comparison of age distribution with the non-diabetic and type 2 diabetic human donor populations. B-H. LDB1 ChIP-qPCR plotted against donor age. Non-diabetic donor ChIPs: blue squares; type 2 diabetic donor ChIPs: red triangles. B. *DDX18* negative control locus. C. *UCN3* locus. D. *PDX1* locus. E. *MAFA* locus. F. *SLC2A2* C3-2 locus. G. *ZMIZ1* locus. H. *GLIS3* C3-2 locus. A-H Non-diabetics donors (n=10) and type 2 diabetic donors (n=6). A. Student's two-way t-test. B-H. Pearson product-moment correlation coefficient, § =  $P < 0.05$ . Child donors excluded from this analysis. C-E. Dotted lines represent linear regression of adult donor values of matching color. Pooled data represent mean  $\pm$  SEM. Absent statistical annotation in A-H indicates comparisons that were not significant.

**Supplemental Table 1. Related to Figure 6. Characteristics of selected human islet active enhancers analyzed for LDB1 occupancy.**

| <b>C3 Element Location<sup>A</sup></b> | <b>Gene<sup>B</sup></b> | <b>Enumeration<sup>C</sup></b> | <b>C3 Element "liftOver"<sup>D</sup></b> | <b>LDB1, ISL1 Common Peak<sup>E</sup></b> | <b>Fasting Glycemia Level-Associated SNP<sup>F</sup></b> | <b>Type 2 Diabetes-Associated SNP<sup>G</sup></b> |
|----------------------------------------|-------------------------|--------------------------------|------------------------------------------|-------------------------------------------|----------------------------------------------------------|---------------------------------------------------|
| 8:143439203-143439699                  | <i>MAFA</i>             | NA                             | 15:755864473-75586962                    | 15:75586642-75586841                      | NA                                                       | NA                                                |
| 7:157016342-157016727                  | <i>MNX1</i>             | C3-1                           | 5:29810809-29811213                      | 5:29810851-29811050                       | NA                                                       | NA                                                |
| 7:157027817-157028360                  | <i>MNX1</i>             | C3-2                           | 5:29823480-29824014                      | 5:29823886-29824085                       | NA                                                       | NA                                                |
| 13:27911256-27912333                   | <i>PDX1</i>             | NA                             | 5:148075216-148076087                    | 5:148075827-148076026                     | NA                                                       | NA                                                |
| 3:171044539-171045825                  | <i>SLC2A2</i>           | C3-1                           | 3:28580712-28582005                      | 3:28581098-28581297                       | NA                                                       | NA                                                |
| 3:170976866-170978735                  | <i>SLC2A2</i>           | C3-2                           | 3:28635895-28637759                      | 3:28636082-28636281                       | rs1905506,<br>rs1905504,<br>rs7635100,<br>rs7635470      | NA                                                |
| 10:5356620-5357372                     | <i>UCN3</i>             | NA                             | 13:3994969-3998803                       | 13:3998398-3998597                        | NA                                                       | NA                                                |
| 9:4289440-4290458                      | <i>GLIS3</i>            | C3-1                           | 19:28743504-28744788                     | 19:28744310-28744509                      | NA                                                       | rs4237150                                         |
| 9:4290466-4291326                      | <i>GLIS3</i>            | C3-2                           | 19:28744802-28745595                     | NA                                        | rs6476842                                                | rs10814915                                        |
| 10:79184111-79184667                   | <i>ZMIZ1</i>            | NA                             | 14:26374197-26374673                     | 14:26374451-26374650                      | NA                                                       | rs703977                                          |
| 2:117813934-117814033                  | <i>DDX18</i>            | NA                             | Deleted                                  | Negative Control Locus                    |                                                          |                                                   |

<sup>A</sup> Human islet active enhancer (C3 element) locus from Human Islet Regulome Browser: GRch38/hg38 (chrN:start-end) (2). <sup>B</sup> Gene proximal to active enhancer that also corresponds to misexpressed murine gene in transcriptomic analysis. <sup>C</sup> Enumeration of multiple enhancers in one locus. <sup>D</sup> Location of human islet active enhancer liftOver in mouse genome: NCBI37/mm9 (chrN:start-end). Human islet active enhancers were mapped to the mouse genome using the UCSC Batch Coordinate Conversion Tool (liftOver) at a 0.1 minimum ratio for bases remapping (3). <sup>E</sup> Location of LDB1, ISL1 common peak overlapping human islet active enhancer liftOver: NCBI37/mm9 (chrN:start-end). <sup>F</sup> Fasting glycemia level-associated SNPs within human islet active enhancer that liftOver to mouse. <sup>G</sup> Type 2 diabetes-associated SNPs within human islet active enhancer that liftOver to mouse. NA = Not Applicable

**Supplemental Table 2. Related to Figure 6. Immunofluorescence human donor information.**

| <b>Donor ID</b> | <b>Source</b>     | <b>Sex</b> | <b>Age</b> | <b>BMI<sup>A</sup></b> | <b>HbA1c (%)<sup>B</sup></b> | <b>Cause of Death</b> | <b>T2D<sup>C</sup> History</b> |
|-----------------|-------------------|------------|------------|------------------------|------------------------------|-----------------------|--------------------------------|
| T2D #78         | IIDP <sup>D</sup> | M          | 59         | 21.2                   | 9.4                          | Stroke                | 14 years                       |
| Non T2D #94     | IIDP <sup>D</sup> | M          | 59         | 25.4                   | NA                           | Anoxia                | NA                             |
| T2D #58         | IIDP <sup>D</sup> | F          | 51         | 34                     | 5.2                          | Stroke                | 15 years                       |
| Non T2d #54     | IIDP <sup>D</sup> | F          | 51         | 21.1                   | 5.2                          | Stroke                | NA                             |

<sup>A</sup> Donor's body mass index (BMI). <sup>B</sup> Donor's hemoglobin A1c (HbA1c). <sup>C</sup> Type 2 diabetes (T2D). <sup>D</sup> Integrated Islet Distribution Program (IIDP). Not applicable (NA)

**Supplemental Table 3. Related to Figure 6. LDB1 ChIP non-diabetic human islet donor information.**

| <b>Donor ID</b> | <b>Source</b>      | <b>Sex</b> | <b>Race</b> | <b>Age</b> | <b>BMI<sup>A</sup></b> | <b>HbA1c (%)<sup>B</sup></b> | <b>Cause of Death</b> | <b>Islet Viability</b> | <b>GSIR<sup>C</sup></b> |
|-----------------|--------------------|------------|-------------|------------|------------------------|------------------------------|-----------------------|------------------------|-------------------------|
| ICRH043         | UPenn <sup>D</sup> | M          | White       | 7          | 20.6                   | U                            | Anoxia                | 97%                    | 2.02                    |
| ICRH059         | UPenn <sup>D</sup> | M          | White       | 8          | 13.6                   | U                            | Head Trauma           | 95%                    | NM                      |
| ICRH073         | UPenn <sup>D</sup> | M          | White       | 37         | 27.7                   | 5.50                         | Anoxia                | 94%                    | 2.7                     |
| ICRH074         | UPenn <sup>D</sup> | F          | Black       | 44         | 23.8                   | U                            | Stroke                | 95%                    | 1.6                     |
| ICRH090         | UPenn <sup>D</sup> | M          | Asian       | 35         | 28.5                   | 5.30                         | Head Trauma           | 95%                    | 3.1                     |
| ABDP112         | IIDP <sup>E</sup>  | M          | Hispanic    | 43         | 22.8                   | 5.70                         | Stroke                | 95%                    | 1.0                     |
| ABDV142         | IIDP <sup>E</sup>  | M          | White       | 32         | 23.1                   | U                            | Anoxia                | 95%                    | 1.6                     |
| ABEL098         | IIDP <sup>E</sup>  | F          | Black       | 47         | 26.5                   | 5.60                         | Stroke                | 95%                    | 2.3                     |
| AAABA479        | IIDP <sup>E</sup>  | M          | White       | 55         | 28.4                   | U                            | Stroke                | 96%                    | 5.5                     |
| AAAL088         | IIDP <sup>E</sup>  | M          | White       | 64         | 25.4                   | U                            | U                     | 90%                    | 3.5                     |

<sup>A</sup> Donor's body mass index (BMI). <sup>B</sup> Donor's hemoglobin A1c (HbA1c). <sup>C</sup> Glucose-stimulated insulin release (GSIR). <sup>D</sup> University of Pennsylvania Center for Islet transplantation (UPenn). <sup>E</sup> Integrated Islet Distribution Program (IIDP). U = Unknown.

**Supplemental Table 4. Related to Figure 6. LDB1 ChIP type 2 diabetic human donor information.**

| <b>Donor ID</b> | <b>Source</b>      | <b>Sex</b> | <b>Race</b> | <b>Age</b> | <b>BMI<sup>A</sup></b> | <b>HbA1c (%)<sup>B</sup></b> | <b>Cause of Death</b> | <b>Islet Viability</b> | <b>GSIR<sup>C</sup></b> | <b>T2D<sup>D</sup> History</b> | <b>T2D<sup>D</sup> Medication</b> |
|-----------------|--------------------|------------|-------------|------------|------------------------|------------------------------|-----------------------|------------------------|-------------------------|--------------------------------|-----------------------------------|
| ICRH017         | UPenn <sup>E</sup> | M          | White       | 47         | 28.7                   | 7.4                          | Stroke                | 96%                    | U                       | 2 years                        | Metformin                         |
| AAFH472         | IIDP <sup>F</sup>  | F          | White       | 69         | 35                     | U                            | Stroke                | 92%                    | 3.6                     | >10 years                      | U                                 |
| AAFS251         | IIDP <sup>F</sup>  | M          | Asian       | 49         | 23.9                   | 6.3                          | Stroke                | 95%                    | 10.2                    | 20 years                       | “pills” <sup>H</sup>              |
| ZKC263          | IIDP <sup>F</sup>  | F          | White       | 65         | 28.85                  | U                            | U                     | 90%                    | U                       | 1 year                         | Metformin                         |
| HP13346         | Prodo <sup>G</sup> | F          | White       | 29         | 38.7                   | 9.9                          | Stroke                | 95%                    | U                       | 2 years                        | Metformin, Glucovance             |
| HP14009         | Prodo <sup>G</sup> | F          | White       | 52         | 32.5                   | 8.2                          | Anoxia                | 95%                    | U                       | U                              | Metformin                         |

<sup>A</sup> Donor's body mass index (BMI). <sup>B</sup> Donor's hemoglobin A1c (HbA1c). <sup>C</sup> Glucose-stimulated insulin release (GSIR). <sup>D</sup> Type 2 diabetes (T2D). <sup>E</sup> University of Pennsylvania Center for Islet transplantation (UPenn). <sup>F</sup> Integrated Islet Distribution Program (IIDP). <sup>G</sup> Prodo Laboratories, Inc. (Prodo). <sup>H</sup> Family testament. U = Unknown.

**Supplemental Table 5. Immunofluorescence/ Immunohistochemistry antisera.**

| Antigen        | Source            | Antibody   | Species        | Clonality | Concentration | Amplification |
|----------------|-------------------|------------|----------------|-----------|---------------|---------------|
| LDB1           | Dr. Paul Love     | NA         | Rabbit         | -         | 1 to 2500     | TSA           |
| LDB1           | Santa Cruz        | sc-11198 X | Goat           | Poly      | 1:1000        | None          |
| NKX6.1         | DSHB <sup>A</sup> | F55A12     | Mouse (MIgG1)  | Mono      | 1 to 3000     | TSA           |
| Insulin        | Abcam             | ab7842     | Guinea Pig     | Poly      | 1 to 100      | None          |
| Insulin        | Dako              | 104840     | Guinea Pig     | Poly      | 1 to 1000     | None          |
| Somatostatin   | Santa Cruz        | sc-7819    | Goat           | Poly      | 1 to 250      | None          |
| Glucagon       | Santa Cruz        | sc-13091   | Rabbit         | Poly      | 1 to 500      | None          |
| GFP            | Abcam             | ab6673     | Goat           | Poly      | 1 to 250      | None          |
| GFP            | Abcam             | ab13970    | Chicken        | Poly      | 1 to 250      | None          |
| Chromogranin A | Abcam             | ab85554    | Rabbit         | Poly      | 1 to 500      | None          |
| GLUT2          | Millipore         | 07-1402    | Rabbit         | Poly      | 1 to 500      | None          |
| PDX1           | Dr. Chris Wright  | NA         | Goat           | -         | 1 to 5000     | None          |
| NEUROG3        | Dr. Maike Sander  | NA         | Guinea Pig     | -         | 1 to 1000     | None          |
| ISL1           | DSHB <sup>A</sup> | 39.4D5     | Mouse (MIgG2b) | Mono      | 3µg/ml        | HRP-ABC       |
| ISL1           | DSHB <sup>A</sup> | 40.2D6     | Mouse (MIgG1)  | Mono      | 3µg/ml        | HRP-ABC       |
| MAFA           | Bethyl            | A300-611A  | Rabbit         | Poly      | 1 to 1000     | TSA           |

<sup>A</sup> Developmental Studies Hybridoma Bank (DSHB). NA = Not Applicable.

**Supplemental Table 6. IP and Western blotting antisera.**

| <b>Antigen</b> | <b>Source</b>     | <b>Antibody</b> | <b>Species</b> | <b>Clonality</b> | <b>Concentration</b> | <b>Use</b>      |
|----------------|-------------------|-----------------|----------------|------------------|----------------------|-----------------|
| LDB1           | Santa Cruz        | sc-11198 X      | Goat           | Poly             | NA                   | IP <sup>B</sup> |
| NA             | Santa Cruz        | sc-2028         | Goat           | NA               | NA                   | IP <sup>B</sup> |
| LDB1           | Dr. Paul Love     | -               | Rabbit         | -                | 1 to 2500            | 1 <sup>oC</sup> |
| ISL1           | DSHB <sup>A</sup> | 39.4D5          | Mouse (MIgG2b) | Mono             | 1µg/ml               | 1 <sup>oC</sup> |
| PDX1           | Dr. Chris Wright  | -               | Mouse (MIgG2b) | -                | 1 to 10000           | 1 <sup>oC</sup> |
| NKX6.1         | DSHB <sup>A</sup> | F55A12          | Mouse (MIgG1)  | Mono             | 0.5µg/ml             | 1 <sup>oC</sup> |
| FOXA2          | Abcam             | ab60721         | Mouse          | Poly             | 1 to 500             | 1 <sup>oC</sup> |
| Mouse IgG      | Santa Cruz        | sc-2005         | Goat           | Poly             | 1 to 3000            | 2 <sup>oD</sup> |
| Rabbit IgG     | Santa Cruz        | sc-2004         | Goat           | Poly             | 1 to 3000            | 2 <sup>oD</sup> |
| Guinea Pig IgG | Santa Cruz        | sc-2438         | Goat           | Poly             | 1 to 3000            | 2 <sup>oD</sup> |

<sup>A</sup> Developmental Studies Hybridoma Bank (DSHB). <sup>B</sup> Immunoprecipitation (IP). <sup>C</sup> Western blot primary (1<sup>o</sup>). <sup>D</sup> Western blot secondary (2<sup>o</sup>). NA = Not Applicable.

**Supplemental Table 7. ChIP-qPCR primers for selected human islet active enhancers analyzed for LDB1 occupancy.**

| <b>C3 Element Location<sup>A</sup></b> | <b>Gene<sup>B</sup></b> | <b>Enumeration<sup>C</sup></b> | <b>Forward-Primer (5' to 3')</b> | <b>Reverse-Primer (5' to 3')</b> |
|----------------------------------------|-------------------------|--------------------------------|----------------------------------|----------------------------------|
| 8:143439203-143439699                  | <i>MAFA</i>             | -                              | ACAGAAAGGGTCGTTTGCA<br>G         | CATTTGGGGCTTGGTAAAT<br>G         |
| 7:157016342-157016727                  | <i>MNX1</i>             | C3-1                           | TAGCGCATTCTGACTCGAA<br>A         | AGTGCAGACTTCCTGCCAT<br>T         |
| 7:157027817-157028360                  | <i>MNX1</i>             | C3-2                           | ATGCAAACGCTGACACAG<br>AA         | TGAGAGTATCTGCGCTGT<br>GC         |
| 13:27911256-27912333                   | <i>PDX1</i>             | -                              | GGGAGTTTGTGACACCAGG<br>A         | GGCAGCGAGAAAACACTA<br>GG         |
| 3:171044539-171045825                  | <i>SLC2A2</i>           | C3-1                           | AGGCATTCTGGCTCTTTTC<br>A         | TCTGCTCCAACAGAGGAG<br>GT         |
| 3:170976866-170978735                  | <i>SLC2A2</i>           | C3-2                           | CTGGGATTTTGTCTTGCTGA<br>T        | ACCGACATGTGGGGTACT<br>GT         |
| 10:5356620-5357372                     | <i>UCN3</i>             | -                              | ACAGCAGCTGAACAAAGC<br>AA         | GGCCTATTAGCCATGCTCA<br>C         |
| 9:4289440-4290458                      | <i>GLIS3</i>            | C3-1                           | GACAGGATTCCATCGGAAG<br>A         | TCGATGGAGAACAGAGGA<br>GAA        |
| 9:4290466-4291326                      | <i>GLIS3</i>            | C3-2                           | CCCATGGGCTTCTCTTGTT<br>A         | CAGCCGTGCATGAGAATA<br>ACT        |
| 10:79184111-79184667                   | <i>ZMIZ1</i>            | -                              | GGATAAGTGCCCTGCAAAT<br>G         | CAGTCCATGGATCAGGTG<br>TG         |
| Negative Control Locus <sup>D</sup>    |                         |                                |                                  |                                  |
| 2:117813934-117814033                  | <i>DDX18</i>            | -                              | TGGAATGAATGGAATTGAA<br>GG        | GGCCACTCTCCTCAGAAA<br>TACA       |

<sup>A</sup> Human islet active enhancer (C3 element) locus: GRCh38/hg38 (chrN:start-end). <sup>B</sup> Gene proximal to active enhancer that also corresponds to misexpressed murine gene in transcriptomic analysis. <sup>C</sup> Enumeration of multiple enhancers in one locus. <sup>D</sup> Information for Negative Control Locus primer set.

### Supplemental References

1. Fadista J, Vikman P, Laakso EO, Mollet IG, Esguerra JL, Taneera J, Storm P, Osmark P, Ladenvall C, Prasad RB, et al. Global genomic and transcriptomic analysis of human pancreatic islets reveals novel genes influencing glucose metabolism. *Proc Natl Acad Sci U S A*. 2014;111(38):13924-9.
2. Pasquali L, Gaulton KJ, Rodriguez-Segui SA, Mularoni L, Miguel-Escalada I, Akerman I, Tena JJ, Moran I, Gomez-Marin C, van de Bunt M, et al. Pancreatic islet enhancer clusters enriched in type 2 diabetes risk-associated variants. *Nat Genet*. 2014;46(2):136-43.
3. Kent WJ, Sugnet CW, Furey TS, Roskin KM, Pringle TH, Zahler AM, and Haussler D. The human genome browser at UCSC. *Genome Res*. 2002;12(6):996-1006.

edited gel for Figure 5  
DB1

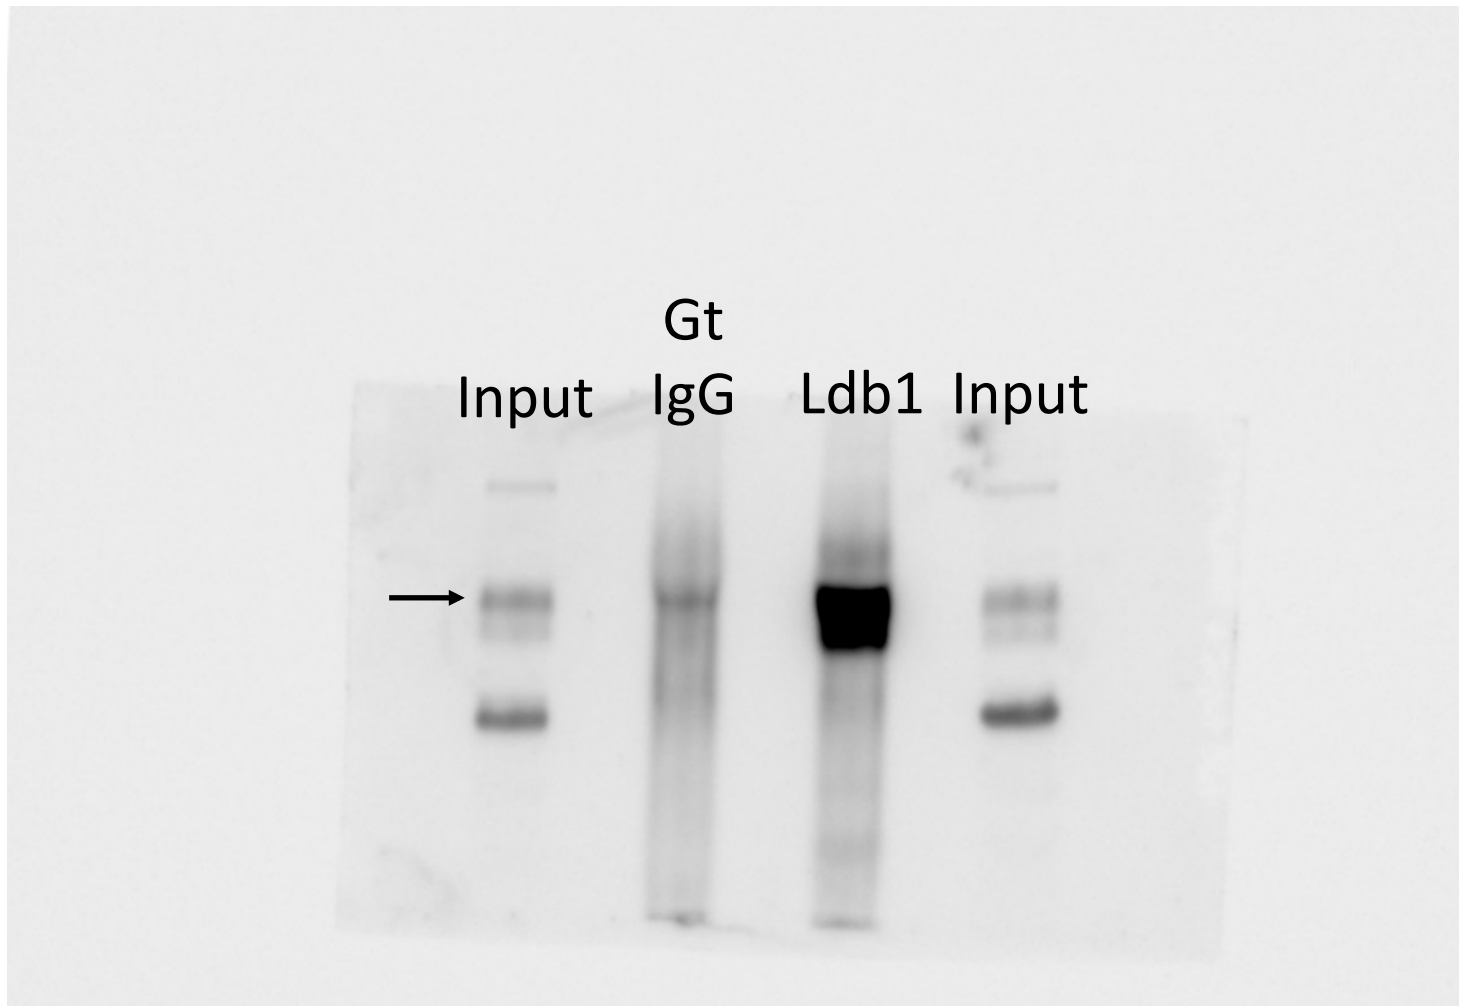

edited gel for Figure 5  
L1

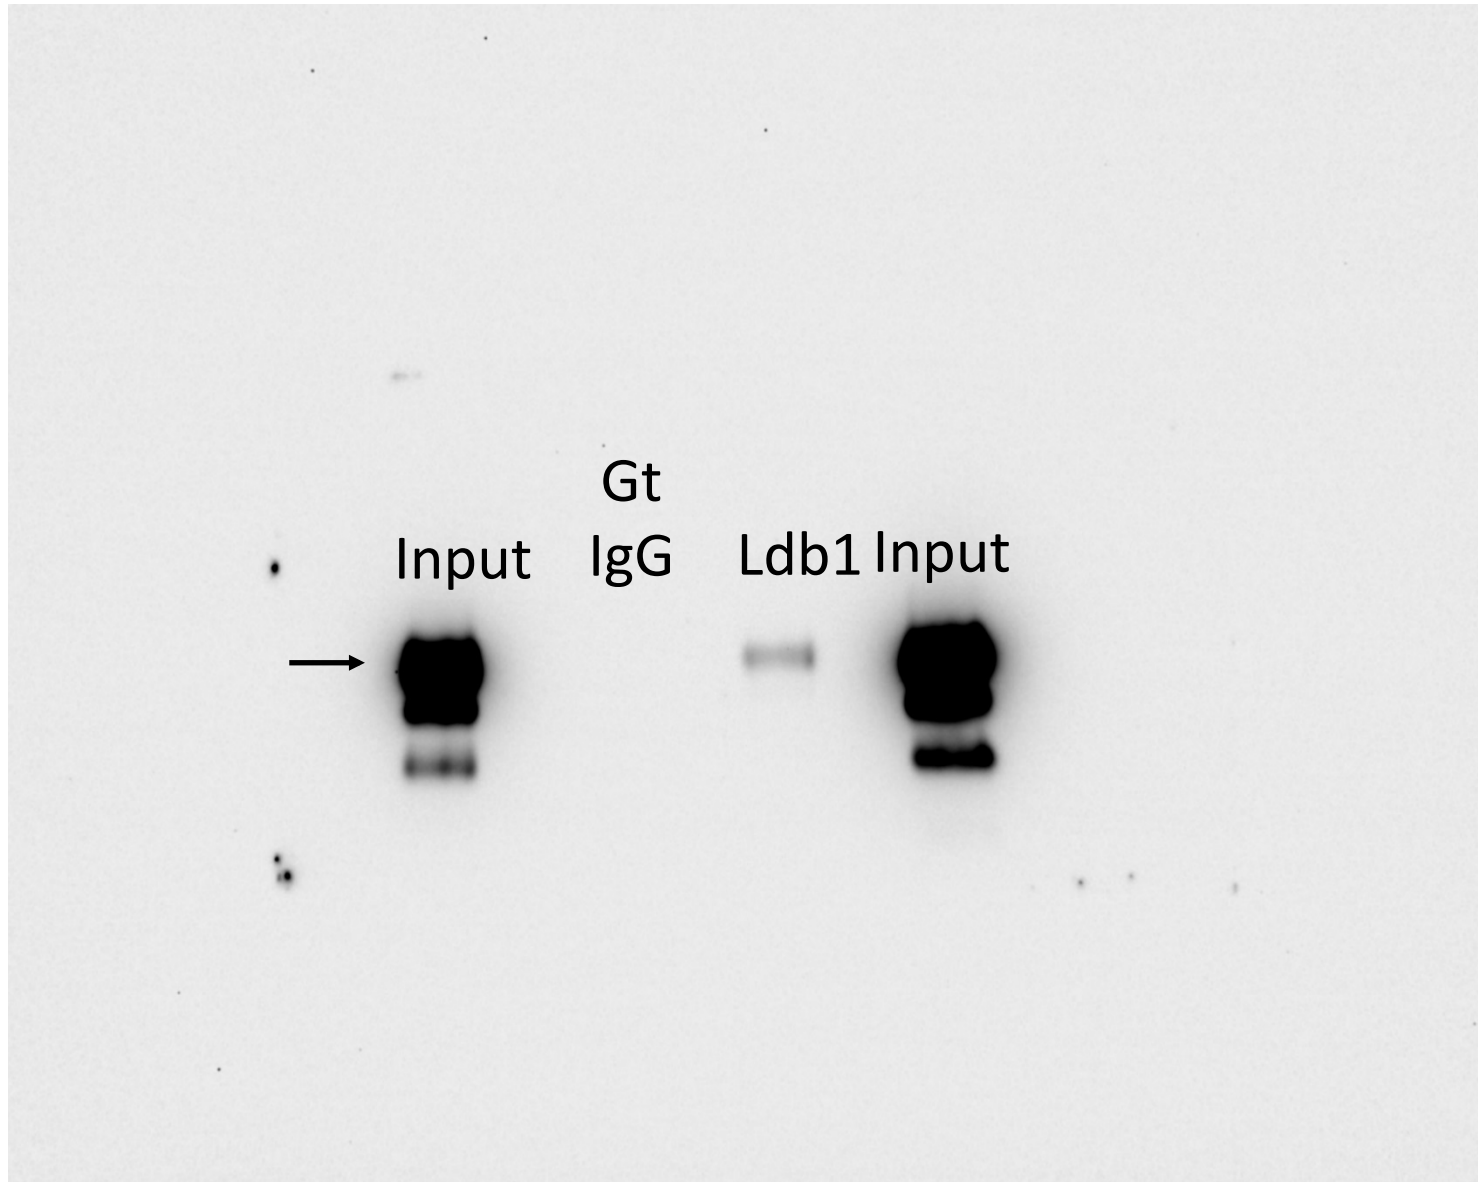

edited gel for Figure 5  
DX1

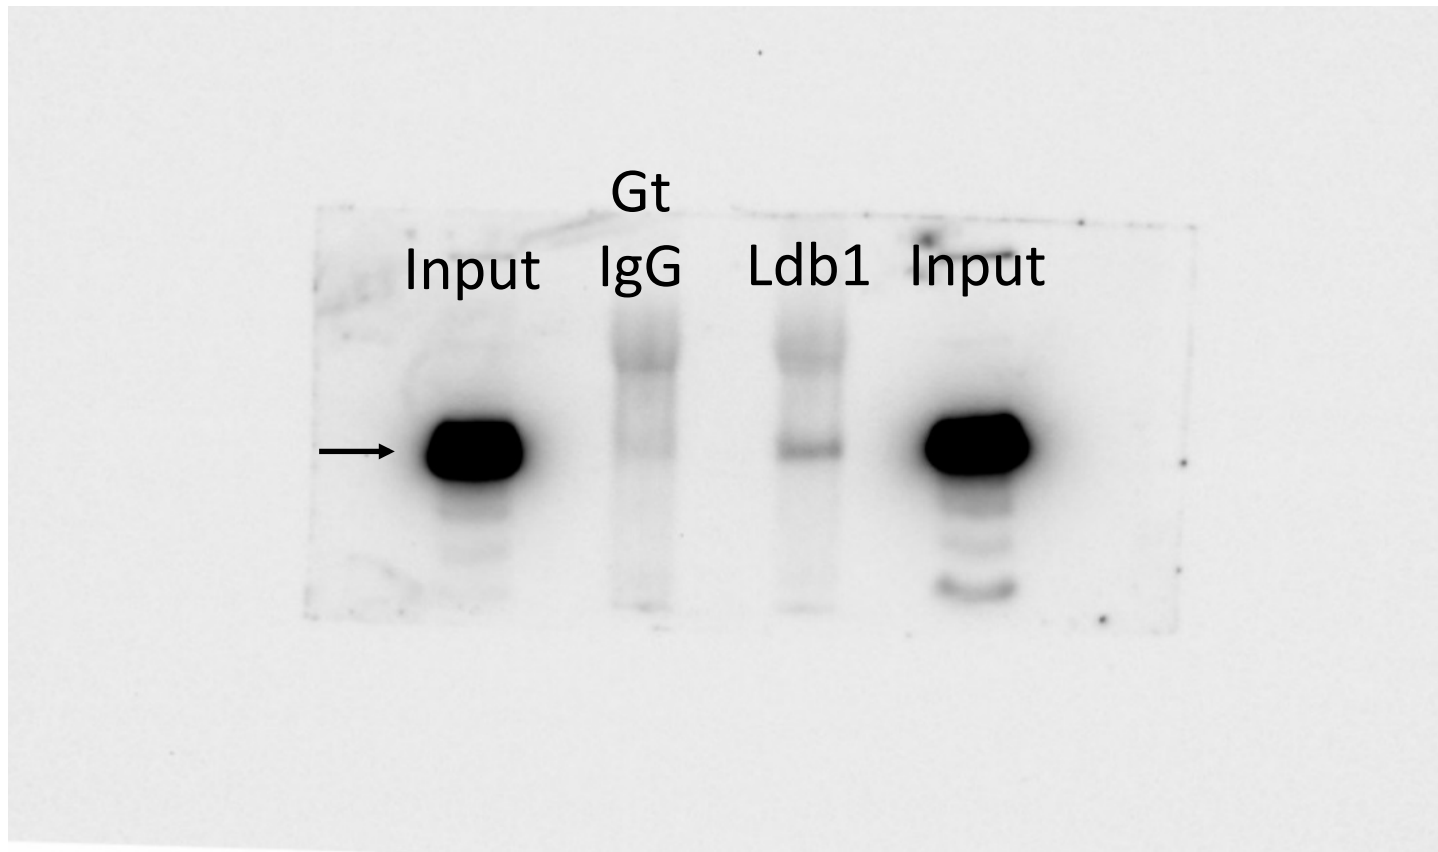

edited gel for Figure 5  
KX6.1

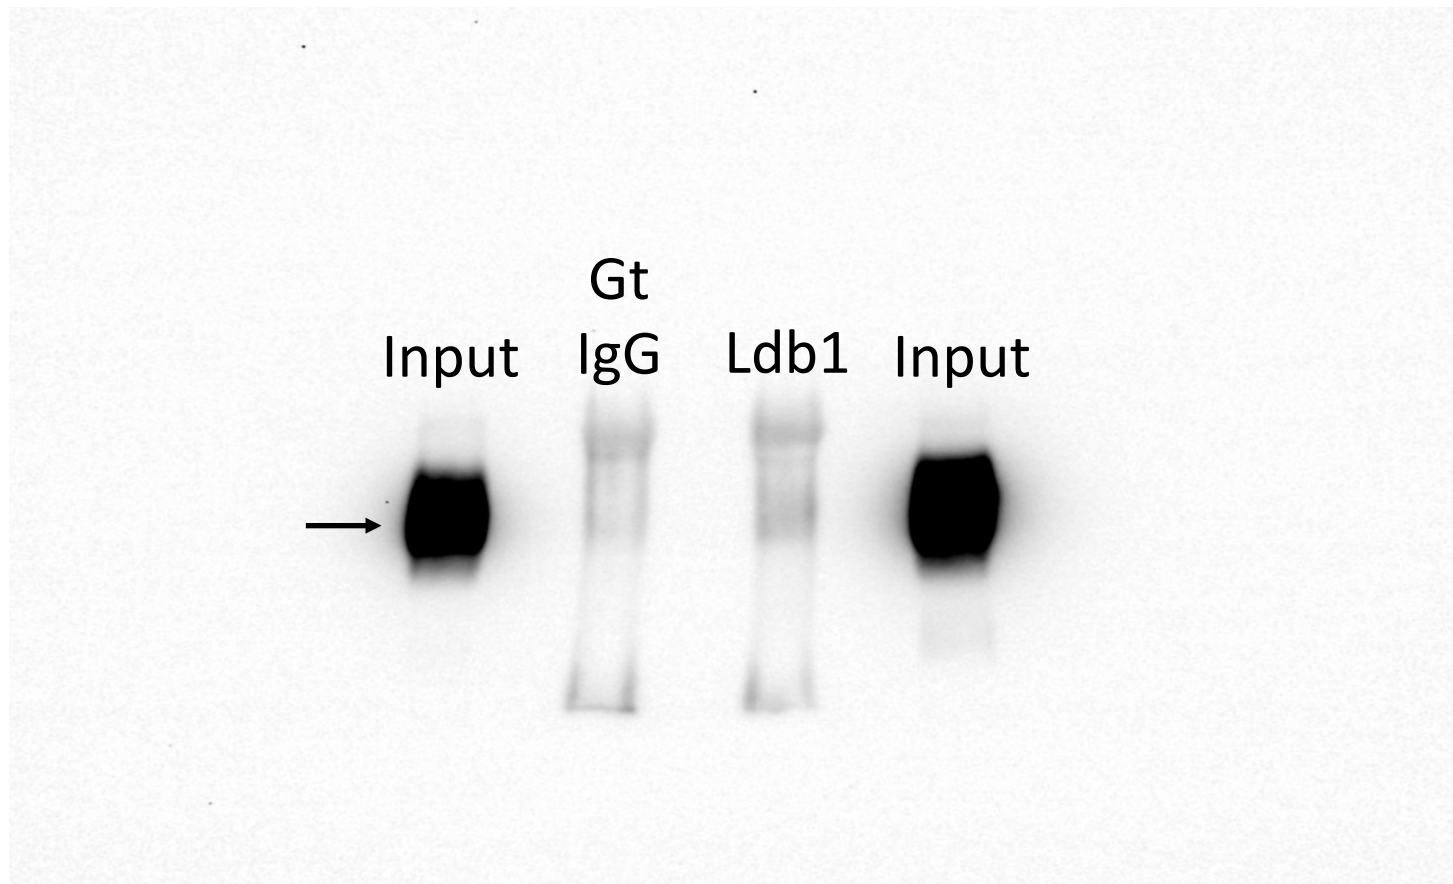

edited gel for Figure 5  
DXA2

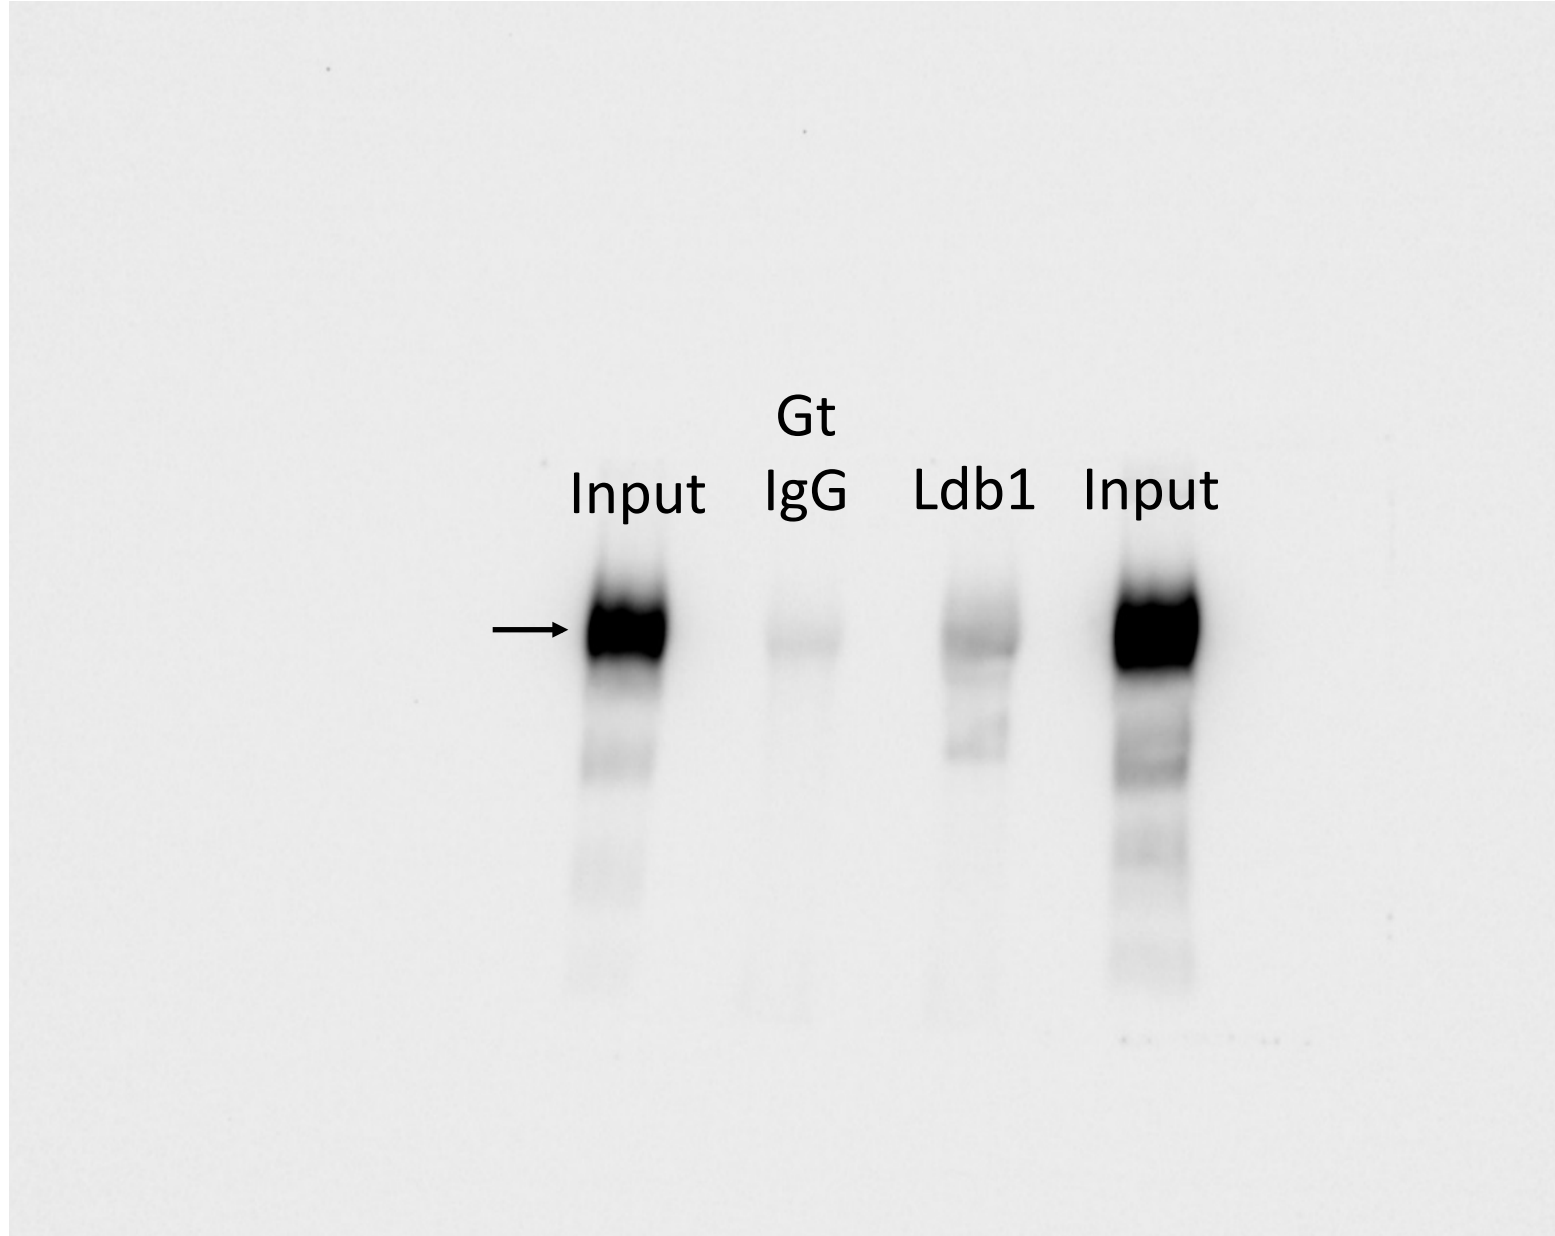

Supplement: sd1 [file 1]
